# Supplementary material for: Obesogenic effects of warm temperature involve feeding adaptation by preoptic area leptin receptor neurons.
Source: Research Square preprint supplement (doi:10.21203/rs.3.rs-7032725/v1), 2025-08-21
Supplement: Supplementary file 1 [file 6b4105f4e956d633d2941fa6.docx]

**Supplementary**
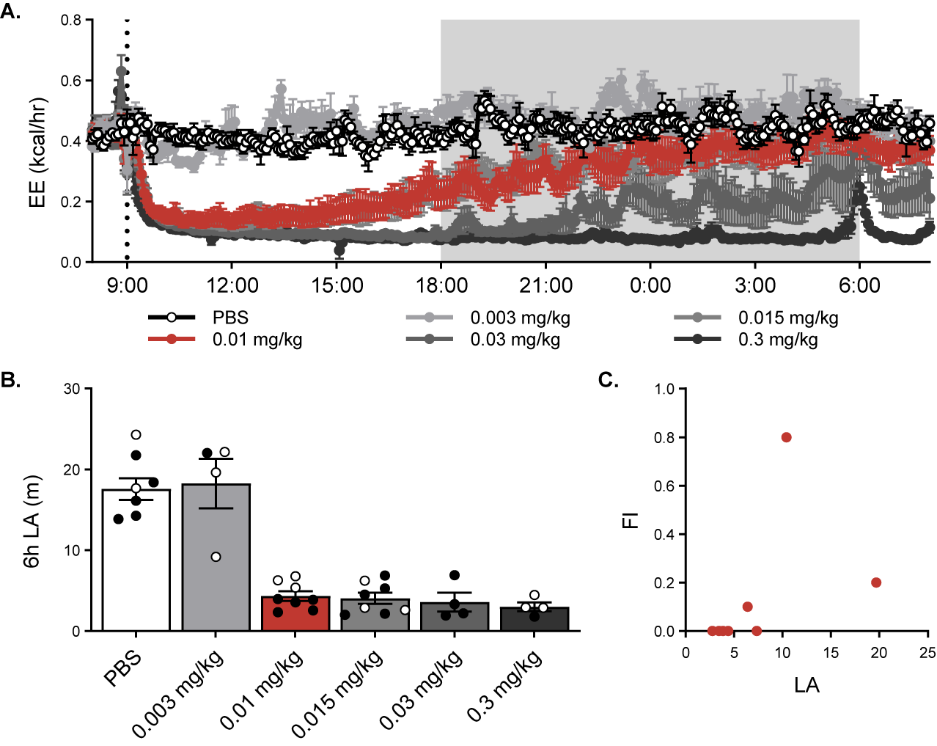
**Figure 1. Validation of injection placement and CNO dose response.** (**A**) Energy expenditure (EE) in LeprCre mice expressing AAV5-hSyn-DIO-hM3D(Gq) in POA neurons following intraperitoneal (i.p.) injection of PBS (n = 8) or varying CNO concentrations (0.003 mg/kg, n = 4; 0.015mg/kg, n = 8; 0.01 mg/kg, n = 8; 0.03 mg/kg, n = 4; 0.3 mg/kg, n = 4) at room temperature (RT). Injections were administered at 09:00. (**B**) Total locomotor activity (LA) in LeprCre mice following PBS or CNO administration. (**C**) Correlation between locomotor activity and food intake (FI) at the 0.01 mg/kg CNO dose. Data are presented as mean ± SEM.

**
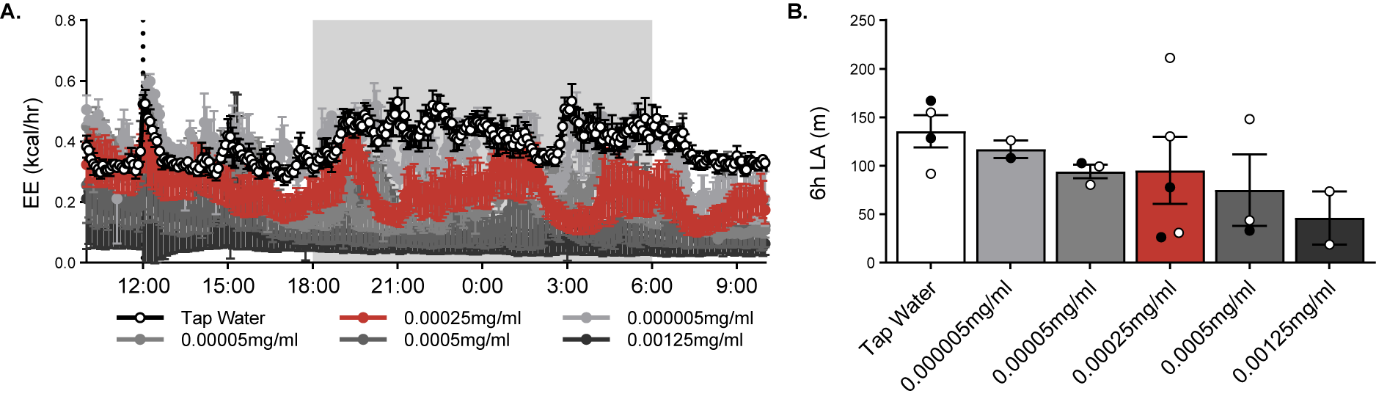
Supplementary Figure 2. CNO drinking-water dose response.** (**A**) Energy expenditure (EE) in LeprCre mice expressing AAV5-hSyn-DIO-hM3D(Gq) in POA neurons following CNO administration via drinking water at varying concentrations (0 mg/ml, n = 5; 0.00025 mg/ml, n = 5; 0.000005 mg/ml, n = 2; 0.00005 mg/ml, n = 3; 0.0005 mg/ml, n = 3; 0.00125 mg/ml, n = 2) at RT. (**B**) Locomotor activity (LA) in LeprCre mice following PBS or CNO administration. Data are presented as mean ± SEM.


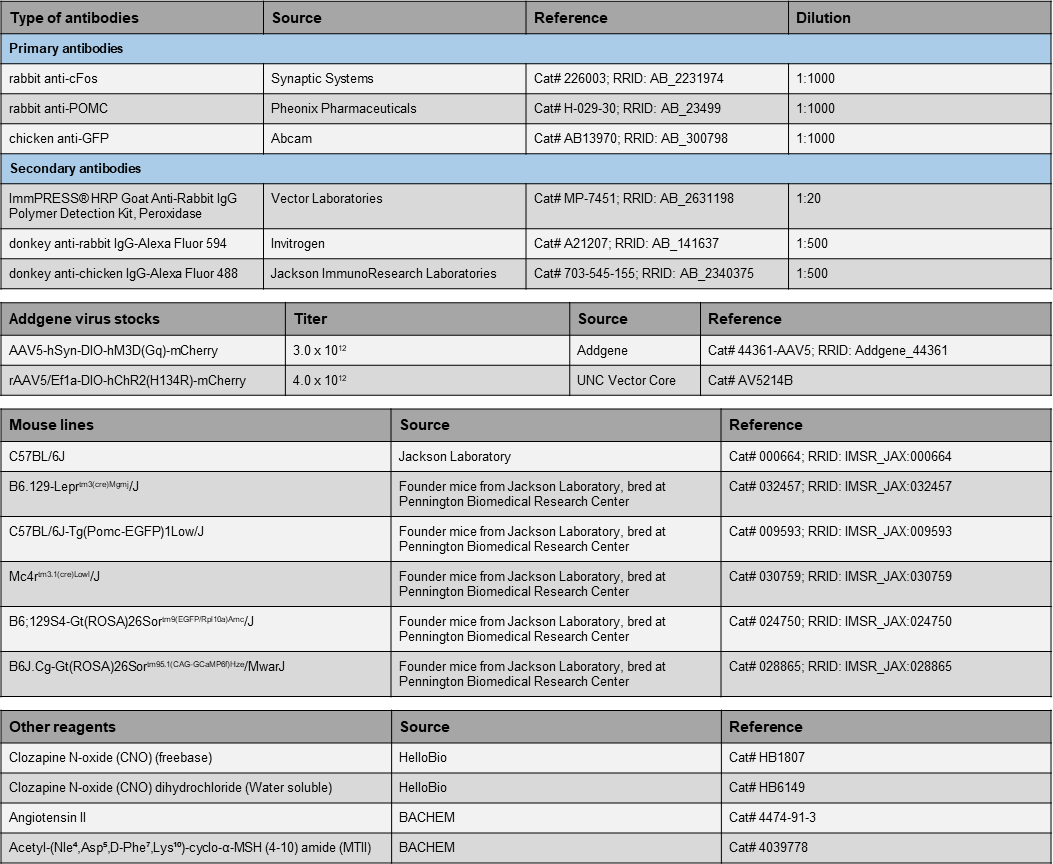
**Supplementary Figure 3.**
